# Supplementary material for: Review of Experience of the Production of Salt Fortified with Iron and Iodine
Source: PubMed Central journal article supplement (PMC7882366; doi:10.1093/jn/nxaa279), 2021-02-15
Supplement: nxaa279_supplementary_tables.pdf [file nxaa279_supplementary_tables.pdf]

# Review of Experience of the Production of Salt Fortified with Iron and Iodine

Alister Shields

## Online Supplementary Material

Supplementary Table 1: Comparison of Key Quality Parameters for Salt for Iodization vs Salt for Double Fortification

| Characteristics                                            | IS 16232:2014<br>Indian Standard<br>For DFS |           | East African Standard 35:2011<br>for Iodized Salt |                 |               | IS 16232:2014<br>Indian Standard<br>For DFS |                      |
|------------------------------------------------------------|---------------------------------------------|-----------|---------------------------------------------------|-----------------|---------------|---------------------------------------------|----------------------|
|                                                            | INPUT SALT FOR<br>THE PRODUCTION<br>OF DFS  |           | FINAL PRODUCT                                     |                 |               | FINAL<br>PRODUCT                            |                      |
|                                                            | FS                                          | EFF       | Coarse<br>salt                                    | Crushed<br>salt | Table<br>salt | Fortified<br>with EFF                       | Fortified<br>with FS |
| Chloride content as (NaCl), % on dry matter basis, min     | ≥99                                         | ≥98       | ≥96.0                                             | ≥96.0           | ≥97.0         | ≥97                                         |                      |
| Moisture content, drying at 105°C, %, m/m, max.            | ≤1.5                                        | ≤1.5      | ≤4                                                | ≤4              | ≤3            | ≤1.5                                        |                      |
| Matter insoluble in water, %, on dry matter basis, max     | ≤1.0                                        | ≤1.0      | ≤1                                                | ≤1              | ≤0.2          | ≤1.0                                        |                      |
| Magnesium (Mg) water-soluble, % on dry matter basis, max   | ≤0.1                                        | ≤0.1      | ≤0.5                                              | ≤0.5            | ≤0.1          | ≤0.1                                        |                      |
| Sulphate (as SO <sub>4</sub> ), % on dry matter basis, max | ≤1.1                                        | ≤1.1      | ≤0.5                                              | ≤0.5            | ≤0.50         | ≤1.1                                        |                      |
| Acid insoluble matter % m/m, Max                           | ≤0.3                                        | ≤0.3      | -                                                 | -               | ≤0.2          | -                                           |                      |
| pH of solution, 20g in 100ml distilled water               | 3.5 – 5.5                                   | 3.5 – 7.5 | 7.0 - 8.0                                         | 7.0 - 8.0       | 7.0 - 8.0     | 3.5 – 7.5                                   | 3.5 – 5.5            |

Abbreviations: DFS, double fortified salt; EFF, encapsulated ferrous fumarate; FS, ferrous sulphate; m/m, mass fraction; NaCl, sodium chloride

Supplementary Table 2: Breakdown of Estimated Production Costs for DFS in India

|                                                      | EFF              |                    | FS               |                    |
|------------------------------------------------------|------------------|--------------------|------------------|--------------------|
|                                                      | Cost<br>(USD/MT) | % of<br>total cost | Cost<br>(USD/MT) | % of<br>total cost |
| Input Salt                                           | 22.48            | 23%                | 28.00            | 31%                |
| Iodization                                           | 1.41             | 1%                 | 1.41             | 2%                 |
| Fortification with Iron<br>Formulation               | 36.53            | 37%                | 22.20            | 25%                |
| Packaging 1kg Individual                             | 16.16            | 16%                | 16.16            | 18%                |
| Packaging Bulk                                       | 5.62             | 6%                 | 5.62             | 6%                 |
| Processing, Finance, Marketing<br>and Administration | 16.16            | 16%                | 16.16            | 18%                |
| <b>Total Cost</b>                                    | <b>98.35</b>     |                    | <b>89.55</b>     |                    |

Abbreviations: DFS, double fortified salt; EFF, encapsulated ferrous fumarate; FS, ferrous sulphate, MT, metric ton; USD United States Dollar

Supplementary Table 3 Encapsulated Ferrous Fumarate Producers

|                           | Responded to Survey | FSSAI Registered <sup>1</sup> | Production Capacity (tpa) | Actual Production 2017-18 | Supplying DFS Producers | No. Of DFS Producers Supplied | EFF Type produced |
|---------------------------|---------------------|-------------------------------|---------------------------|---------------------------|-------------------------|-------------------------------|-------------------|
| Wella Neutralogicals      | Yes                 | Yes                           | 1,500                     | Unknown                   | Yes                     | 4                             | Type 1c           |
| Nutracare                 | Yes                 | No                            | 1,200                     | 70                        | Yes                     | 2                             | Unknown           |
| Salvi Chemical Industries | No                  | No                            | Unknown                   | Unknown                   | Yes                     | 1                             | Unknown           |
| Hexagon Nutrition         | No                  | Yes                           | Unknown                   | Unknown                   | No                      | 0                             | Unknown           |
| Pristine Organics         | No                  | Yes                           | Unknown                   | Unknown                   | No                      | 0                             | Unknown           |
| Vantage-Nutrition         | No                  | Yes                           | Unknown                   | Unknown                   | No                      | 0                             | Type 1b           |

<sup>1</sup>As of September 2019

Abbreviations: DFS, Double Fortified Salt; FSSAI, Food Safety and Standards Authority of India; Tpa, metric tons per annum

Supplementary Table 4: DFS Production by Producer (metric tons per year), India 2016 – 2018<sup>1</sup>

| DFS Producer                | Production      |                |                |                          |
|-----------------------------|-----------------|----------------|----------------|--------------------------|
|                             | Quoted Capacity | Actual 2016-17 | Actual 2017-18 | 2018-2019 as at Nov 2018 |
| Ankur                       | 100,000         | Unknown        | Unknown        | 100,000                  |
| Bajaj                       | 60,000          | 15,500         | 15,000         | Upgrading                |
| Balaji                      | 60,000          | 10,000         | 0              | 0                        |
| Chirai                      | 43,000          | 5,364          | 2825           | 3,846                    |
| Chougale                    | 80,000          | 6000           | 0              | 1,000                    |
| Goyal <sup>2</sup>          | 50,000          | -              | -              | 0                        |
| Indo-Brine                  | 45,000          | 10,000         | 32,000         | 0                        |
| Jagannath                   | 64,800          | 3,187          | 77.5           | 505.6                    |
| Maheshwari <sup>3</sup>     |                 |                |                |                          |
| Prince International        | 24,000          | -              | -              | 5,000                    |
| Sahayamatha Salterns        | 24,000          | -              | -              | 0                        |
| Shree Chemfood Pvt Ltd      | 79,000          | 16,000         | 1,700          | 1,500                    |
| Shreeram Chemfood Pvt. Ltd  | 60,000          | -              | 1,061          | 434                      |
| Sunder Salt <sup>4</sup>    |                 |                |                |                          |
| Super Salt                  | Unknown         | -              | 26,500         | -                        |
| Tamil Nadu Salt Corp        | 10,000          | 4,796          | 2,860          | 5,207                    |
| Tata Chemicals <sup>5</sup> |                 |                |                |                          |
| Terapanth Foods             | 60,000          | 624            | 0              | 0                        |
| Vibrant Salt                | 120,000         | 100            | 210            | 53                       |
| Western                     | 34,200          | 210            | 0              | 0                        |

<sup>1</sup> An additional four licensed producers did not respond to the survey and are not included in the above table

<sup>2</sup> Total production 2016-18 production of 9600t

<sup>3</sup> Currently in setup up phase and not producing

<sup>4</sup> Produces multiple-fortified salt - volumes not supplied

<sup>5</sup> Production outsourced to Shreeram Chemfood above

Abbreviations: DFS, Double Fortified Salt

Supplementary Table 5: Appearance of Black Spots in DFS Amongst Currently Active Producers Using EFF

| <b>DFS Producer</b>        | <b>Iron compound in use</b> |              | <b>Appearance of Black Spots in DFS</b> |                   |
|----------------------------|-----------------------------|--------------|-----------------------------------------|-------------------|
|                            | <i>EFF</i>                  | <i>FS</i>    | <i>Reported?</i>                        | <i>EFF Source</i> |
| Ankur                      | Yes                         | On Request   | Previously                              | Nutra Care        |
| Bajaj                      | Yes                         | Discontinued | Yes                                     | Wella             |
| Chirai                     | Yes                         | No           | Yes                                     | Nutra Care        |
| Chogle                     | Yes                         | Unknown      | No response                             | Unknown           |
| Jagannath                  | Yes                         | Discontinued | Yes                                     | Wella             |
| Shree Chemfood Pvt Ltd     | Yes                         | Yes          | Yes                                     | Wella             |
| Shreeram Chemfood Pvt. Ltd | Yes                         | Discontinued | Yes                                     | Unknown           |
| Vibrant Salt               | Yes                         | No           | Yes                                     | Salvi             |

Abbreviations: DFS, Double Fortified Salt; EFF, encapsulated ferrous fumarate; FS, ferrous fumarate
